1  
2  
3  
4  
5  
6  
7  
8  
9  
10  
11  
12  
13  
14  
15  
16  
17  
18  
19  
20  
21  
22  
23

**Acceptability of a community health worker- led health literacy intervention on lifestyle modification among hypertensive and diabetes patients in the City of Harare, Zimbabwe**

Nyaradzai Arster Katena<sup>1</sup>, Shepherd Shamu<sup>1</sup>, Golden Tafadzwa Fana<sup>2</sup>, Evans Dewa<sup>3</sup>, Admire Dombojena<sup>3</sup>, Simbarashe Rusakaniko<sup>1</sup>

1. Global Public Health and Family Medicine Department, University of Zimbabwe, Faculty of Medicine & Health Sciences
2. Department of Medicine, University of Zimbabwe, Faculty of Medicine & Health Sciences
3. City of Harare, City Health Department

**Corresponding Author**

Nyaradzai A. Katena  
University of Zimbabwe  
Faculty of Medicine & Health Sciences ,Department of Global Public Health & Family Medicine  
P.O Box A178, Avondale Harare Zimbabwe

E-Mail Address [nyarikatena@gmail.com](mailto:nyarikatena@gmail.com)

Mobile Number +263773851093

24 **Abstract**

25

26 Deploying community health workers (CHWs) is a vital strategy to improve health at a community level  
27 in low- and middle-income countries. Whilst there is substantial evidence on the effectiveness of CHWs  
28 interventions, there is a need for more research on the mechanisms through which these interventions  
29 work. Understanding the acceptability of these interventions is one way of assessing the mechanisms  
30 through which they work. This article examines the acceptability of a community health worker- led  
31 health literacy intervention on lifestyle modification among hypertensive and diabetes patients based on  
32 the perspectives of the CHWs, community nurses and diabetes and hypertensive patients. A qualitative  
33 study was imbedded within a cluster randomized trial to assess the effectiveness community health  
34 worker- led health literacy intervention on lifestyle modification among hypertensive and diabetes  
35 patients in the City of Harare, Zimbabwe. Data were gathered through semi-structured interviews with 3  
36 community health nurses and 15 diabetes and hypertension patients as well as 2 focus group discussions  
37 with CHWs. Data were analyzed manually using the thematic analysis method. There was consensus that  
38 the intervention had many benefits amongst CHWs and community nurses. However, among patients,  
39 there were mixed perceptions regarding the benefits of the intervention. The main challenges that were  
40 mentioned by CHWs include resistance to advice by patients, insufficient resources, and lack of  
41 acceptance at some of the patient’s homes. All participants believed the intervention was acceptable.  
42 Our study provides vital information that should be considered in upscaling CHW led interventions.

43

44 **Key words:** Acceptability, Community Health Worker, Diabetes, Hypertension, Lifestyle modification,  
45 Zimbabwe, Qualitative

46

47

48

49

## 51 INTRODUCTION

52 Deploying community health workers (CHWs) is a vital strategy to improve health at a community level  
53 in low- and middle-income countries (LMICs) [1–4]. Community health workers are voluntary public  
54 health workers who play a crucial role of primary and tertiary prevention of diseases[5].  
55 Implementation of public health interventions through CHWs can facilitate the linkage between  
56 communities and health services and thus ensure community participation. For many years, CHWs in  
57 LMICs have been providing community-based care, but their efforts have been focused on home-based  
58 caring for people living with the HIV and TB, with little being done around non-communicable  
59 diseases[5]. This is despite an increase in the burden of NCDs in LMICs over the recent years.  
60 Worldwide, NCDs kill 41 million people each year, which is equivalent to 74% of all deaths globally[6,7].  
61 Each year, 17 million people die from a NCD before the age of 70 and 86% of these premature deaths  
62 occur in LMICs . Overall, 77% of all NCDs deaths are in LMICs. Amongst all NCDs, cardiovascular diseases  
63 account for most NCD deaths, with 17.9 million deaths annually[6,7].

64

65 The contribution of CHWs to infectious chronic diseases care in many LMICs suggests they could play a  
66 significant role in NCDs management in these countries. Management of NCDs in these countries is often  
67 poor with health systems struggling with several challenges that include staff shortages[8]. Hence  
68 involvement of CHWs in the management of NCDs is important. In the countries where the CHWs  
69 participated in the management of NCDs, their roles had included education and awareness, screening  
70 and monitoring, support for medication and lifestyle modification adherence, referral to healthcare  
71 professionals and advocating for healthier environments[5,9,10].

72

73 Diabetes and hypertension are amongst the most prevalent NCDs worldwide and CHW-led interventions

74 for these conditions are increasing becoming popular in LMICs[11]. Overall, CHWs provide additional  
75 workforce for the management and care of hypertension and diabetes patients where resources are  
76 limited and allow for task shifting to alleviate overstretched health systems [12,13]. Several studies have  
77 reported positive outcomes for CHWs interventions such as reduced cardiovascular risk, improved  
78 medication adherence, improved lifestyle modification and improved quality of life[3,14–18].  
79 Community health workers can play a beneficial role in improving health outcomes among diabetes and  
80 hypertensive patients, while improving equity in health care delivery[19] (Jeet et al. 2017)]. As a result,  
81 it is increasingly recommended that services be offered outside of health facilities in communities, to  
82 address the rising burden of hypertension and diabetes.

83 There are several studies that indicate that the global increase in the burden of hypertension and  
84 diabetes has seen a growing use of CHWs to support patients on treatment and this has resulted in good  
85 clinical outcomes. In a scoping review of 54 articles on the role of community health workers in type 2  
86 diabetes mellitus self-management, it was concluded that CHWs play several roles, including structured  
87 education, ongoing support and health system advocacy [20]. Another review on studies evaluating the  
88 effectiveness of community-based interventions for prevention of Type 2 diabetes in LMICs also  
89 confirmed the successful use of CHWs in management of type 2 diabetes [21]. Gyawali and Kallestrup  
90 recommended that more evidence from randomized controlled trials on culturally tailored, community-  
91 based interventions is needed to compare findings and test implementation in practice[21]. In a  
92 participatory qualitative research project carried out by Chimberengwa and Naidoo, it was concluded  
93 that in management of hypertension, CHWs were a key link between the community and the formal  
94 health delivery care system [18].

95

96 Whilst there is substantial evidence that CHW programs improve a range of health outcomes, these

97 benefits tend to reduce or disappear when CHW programs are scaled up. One of the reasons for the  
98 reduction is low uptake of the interventions. Low uptake of public health interventions can be a result of  
99 poor acceptability[22]. Acceptability has increasingly become a key consideration in the design and  
100 implementation of public health interventions[22] . Successful implementation and uptake of a public  
101 health intervention depend on acceptability of the intervention by health care providers, communities,  
102 and the patients. For instance, if an intervention is considered acceptable by patients, they are more  
103 likely to adhere to treatment recommendations and thus benefit from improved clinical outcome.  
104 Likewise, if healthcare providers consider an intervention as acceptable, they are more likely to deliver it  
105 as intended, which also enhances the effectiveness of the intervention.

106  
107 In Zimbabwe, CHWs provide community-based care, but for years, their efforts have been focused on  
108 home-based care for people with HIV and TB, with little done around NCDs[23]. This shows the need to  
109 continuously come up with effective CHW-led interventions for management common NCDs. This  
110 paper reports on a qualitative study to assess the acceptability of a community health worker- led  
111 health literacy intervention on lifestyle modification among hypertensive and diabetes patients in the  
112 City of Harare, Zimbabwe. The study was imbedded in a cluster randomised trial to assess the  
113 effectiveness of the intervention.

## 114 115 116 **METHODS**

### 117 **Ethics statement**

118 Ethics approval was granted by the Joint Research Ethics Committee for University of Zimbabwe Faculty

119 of Medicine & Health Sciences and the Parirenyatwa Group of Hospitals (Ref: JREC 339/ 2022) as well as  
120 the Medical Research Council of Zimbabwe (Ref: MRCZ/A/3059). Formal written Informed consent was  
121 obtained from participants before data collection.

122

### 123 **Study setting.**

124 The study was conducted in 3 City of Harare primary health care clinics, which were in the intervention  
125 arm of the cluster randomised controlled trial to assess the effectiveness of the intervention. The 3  
126 health facilities are part of of 39 health facilities (12 polyclinics, six family health services clinics, 15  
127 satellite clinics and two infectious diseases hospitals) in the city. The 3 facilities offer comprehensive  
128 primary health care services, which include curative services, care of chronic patients, maternal and child  
129 health services, human immune-deficiency(HIV) prevention services and community health services.  
130 These clinics are in the high-density suburbs of the city, with each clinic catering for a population of 80  
131 000 -100 000 people, who are mostly socio-economically disadvantaged.

132

### 133 **Study design.**

134 Our study employed a qualitative design The qualitative study was imbedded in an ongoing cluster  
135 randomized trial. The aim of the cluster randomized controlled trial was to assess the effectiveness of a  
136 community health worker–led health literacy intervention on lifestyle modification among patients with  
137 hypertension and diabetes, which was designed by the principal investigator (NAK).

138

139

### 140 **Conceptual Framework**

141 Acceptability was assessed from the perspectives of the CHWs, community nurses and patients, using  
142 a conceptual framework that we adapted from 3 most used theoretical frameworks for acceptability; the  
143 Acceptability Framework by Sekhon et al, 2017; the Theoretical Framework for acceptability- TIFA by Sallis  
144 et al 2019 and the Acceptability Model by Sidani et al 2015[22]. Based on these three models, we  
145 assessed five components of acceptability were assessed, as shown in Table 1 below:

146 **Table 1: Acceptability constructs used**

| Acceptability construct                | Definition                                                                                         |
|----------------------------------------|----------------------------------------------------------------------------------------------------|
| Perceived effectiveness                | Beliefs about the intervention's ability to achieve its intended goals                             |
| Perceived benefits                     | Beliefs about the advantages and positive outcomes of the intervention                             |
| Perceived barriers                     | Beliefs about the obstacles, challenges or negative consequences of the intervention               |
| Perceived feasibility                  | Beliefs about the practicality and ease of implementing the intervention                           |
| Perceived compatibility and ethicality | Beliefs about how well the intervention aligns with existing values, beliefs, norms and practices. |

147

148

149 **Description of the community health worker -led health literacy intervention for lifestyle modification**  
150 **among hypertensive and diabetes patients.**

151 Participants in the intervention arm of the cluster randomised controlled trial received a simple health



152 literacy intervention on lifestyle modification which was delivered by trained community health workers.  
153 The intervention consisted of four face-to-face interactive educational sessions and monthly support  
154 visits and the content of the educational sessions were based on the constructs of the Health Belief  
155 Model. The intervention was implemented over a period of six months. A protocol for the cluster  
156 randomised controlled trial that contains full details of the intervention the implementation has been  
157 published in the JMIR research protocols journal[24].

158

### 159 **Study participants.**

160 A total of 43 participants participated in the study. We interviewed 3 community health nurses, who are  
161 the supervisors of CHWs and 25 patients (6-8 patients per clinic). A total of 15 CHWs who implemented  
162 the intervention also participated in three focus group discussions (7 participants per group) .

163

### 164 **Data Collection**

165 Data was collected during the implementation of the intervention (a month after the start of the  
166 implementation up to to the end of the implementation), during the period 01 August 2023- 31 January  
167 2024. The principal researcher (NAK) and 2 trained research assistants (ED and AD) were involved in the  
168 data collection and thematic data analysis. In-depth interviews (IDIs) were held with community health  
169 nurses and patients, whilst focus group discussions (FGDs) were held with the CHWs. All the FGDs and  
170 interviews were audio recorded, using the researchers' smart phones.

171

172 We used a guide (Supporting file) that was in the vernacular language (ChiShona) to conduct the  
173 interviews and the discussions. The questions were based on our conceptual framework, described

174 earlier in this section. Examples of questions that were included in the guides were (1) what are the main  
175 challenges are you met in implementing the intervention? (2) what are the benefits of implementing this  
176 intervention? (3) how did this intervention help you? (4) what did you like about the intervention? and  
177 (5) what did you not like about the intervention? In-depth interviews with community health nurses  
178 were conducted in a private space at the local clinic, whilst the interviews with patients were conducted  
179 at their homes. Focus group discussions with CHWs were conducted at the clinics.

180

### 181 **Data analysis.**

182 The thematic analysis method was used to analyze the data, in accordance with the six steps described  
183 by Braun and Clarke[25] and following a deductive-inductive approach with a pre-existing framework  
184 that was based on our conceptual framework.

185 The three researchers who were involved in the analysis (NAK, ED and AD) listened to all recordings and  
186 deductively coded all transcripts separately using the coding sheet derived from the analytical  
187 framework. The principal investigator (NAK) then compared the sets of coded transcripts noting  
188 differences in coding. The differences were subsequently discussed and resolved by consensus.

189

## 190 **RESULTS**

### 191 **Characteristics of study participants**

192 Table 2 below shows the characteristics of participants for the IDIs and FGDs

193 ***Table 2: characteristics of study participants***

| Category of participants | Sex | Age | Description |
|--------------------------|-----|-----|-------------|
|--------------------------|-----|-----|-------------|

---

|                  | Male | Female |                                   |
|------------------|------|--------|-----------------------------------|
| Patients         | 11   | 14     | Median (IQR)<br>53 (42- 68) years |
| CHWs             | 0    | 15     | Median (IQR)<br>42 (36-54) years  |
| Community Nurses | 0    | 3      | Range<br>48 to 61 years           |
| Total            | 11   | 32     | Median (IQR)<br>45 (35-58) years  |

---

194

195

196

197

198

199

200

### **Participants' Perceptions on our Intervention**

201

Our study revealed the 5 broad themes of acceptability under the conceptual framework. There were no additional themes that were derived from the analysis . All the themes, subthemes and supporting verbatim of study are presented in Table 3.

204

205

#### ***Perceived benefits***

206

There was consensus that the intervention had many benefits amongst CHWs and community nurses.

207

However, amongst patients, there were mixed perceptions regarding the benefits of the intervention.

208 Patients highlighted easy access to information on lifestyle modification and involvement of social  
209 support as the key benefits of the intervention. Community nurses also mentioned relief from high  
210 workload as another benefit of the intervention.

211

212 Easy access to information about lifestyle modifications required to manage hypertension and diabetes  
213 was the benefit that was mentioned mostly by the patients. All patients who were interviewed believed  
214 if CHWs are trained on the recommended lifestyle modifications, they will be able to get the information  
215 easily within their communities, without the need to visit the local clinics or private hospitals. Some of  
216 the patients also highlighted that they trust their community health workers and had a good relationship  
217 with them such that it was easier to get information without any fear. One of the patients (elderly  
218 female) commented that *“this intervention is very good. It will make us save money. We will no longer  
219 need to go to the clinics to ask about how to manage our conditions”*. Another male patient also  
220 commented that *what’s good about your intervention is that the CHWs live with us, so we can get  
221 information from them anytime, even on Sundays when you don’t open your clinics”*.

222

223 From the perspective of CHWs, the benefits that were mentioned include increased access to health care,  
224 improved quality of life of diabetes and hypertensive patients and cost effectiveness. The CHWs believed  
225 this intervention has the benefit of serving as a bridge between clinics and the patients in the community,  
226 thus improving access to health care for diabetes and hypertension patients who are mostly of advanced  
227 age. One CHW commented that *“Our patients are usually old and they do not have money to go to the  
228 clinics. So teaching them at their home is a big benefit”*. Another CHW also added that *“For diabetes and  
229 hypertensive patients, going to the clinic to get information only is a mammoth task because they need  
230 to pay consultation fee (USD5), Therefore this intervention will also benefit those without money”*

231

232

233 Patients, particularly the male ones highlighted the involvement of other family members in the  
234 counselling sessions as a key benefit of the intervention. One of the male patients said *“This intervention  
235 is good because when the CHW came to my home to teach me, my wife, and my grandchildren whom I  
236 stay with were also involved. This helps a lot because they now remind me to take the recommended  
237 actions.”*

238

239 All nurses who were interviewed commended the intervention for reliving them from the duty of making  
240 home visits as well as counselling the patients. They believed that empowering the CHWs to counsel and  
241 monitor patients with regards to lifestyle modification is a good practice, considering that most health  
242 facilities in the City of Harare are short staffed. One of the nurses had this to say *“This is indeed good.  
243 With the prevalence of diabetes and hypertension increasing, they are better managed at community  
244 level, whilst we deal with cholera and other infectious diseases that are also highly prevalent in the City  
245 of Harare.”*

246

247

### 248 ***Perceived effectiveness***

249 One of the benefits that was mostly mentioned across all participant groups was effectiveness of the  
250 intervention. All community health and the CHWs believed the intervention is effective in improving  
251 adherence to recommended lifestyle modifications and overall health outcomes among the patients.  
252 However, when it came to the patients, there were some who believed the intervention was not

253 effective. One community nurse commented that “ *Lifestyle modification is an important component of*  
254 *managing hypertension and diabetes, but some of our patients do not know that. Therefore, this*  
255 *intervention will help people to understand*”. A CHW also commented that “*teaching people is indeed*  
256 *helpful. We have done that in other programmes such as the Friendship bench. Those programmes were*  
257 *quite useful. Therefore, this intervention will also be effective*”. One of the patients who did not believe  
258 *that the intervention was not effective had this to say; “interventions that focus on teaching people do*  
259 *not work. Only medication helps sick people*”.

260

261

## 262 ***Perceived compatibility and ethicality***

263 All categories of participants believed that since the intervention is implemented by CHWs, it will help  
264 in addressing cultural issues important to lifestyle modification, by virtue of sharing the same cultural  
265 and linguistic background with the patients. For instance, one of the patients said “*You did well by making*  
266 *our CHWs teach us about the food that we should eat when we are diagnosed with diabetes or*  
267 *hypertension. They give us examples of the food that is available in our communities, unlike your doctors*  
268 *who will say eat food that is not available in our society*”. Regarding the same issue, one of the CHWs  
269 also commented that “*when I teach the patient I would have known already if his/ her religion does not*  
270 *allow some foods, so I will not mention those as examples of foods that should be eaten even if they are*  
271 *the recommended ones. I will talk about other acceptable substitutes*”. A community nurse also said that  
272 “*These ladies (CHWs) will come up with better educational messages than us because they know what*  
273 *the community wants, values and needs*”. However, the CHWs also highlighted that there are some  
274 patients who are reluctant to be visited at their homes but prefer to meet the CHWs at other places such  
275 as the CHW’s home, the clinic or even at church because they want to maintain their privacy. This opinion

276 was also raised by one of the patients who said *“as for me, I am not comfortable with the CHWs coming*  
277 *to my home, they will notice my poverty. I would rather go to their home to receive counselling because*  
278 *they are public figures, so their homes are open to everyone.”*

279

280

### 281 ***Perceived Barriers***

282 Potential challenges of this intervention were mainly mentioned by the CHWs. The main challenges that  
283 were mentioned by CHWs include resistance to advice by patients, insufficient resources, and lack of  
284 acceptance at some of the patient’s homes. One of the CHWs said that *“the challenge is that people will*  
285 *attend the counselling session, but they do not practice what we teach them. Therefore, the intervention*  
286 *will appear as if it is not effective”*. Another CHW commented that *“whilst we live in the community,*  
287 *carrying out home visits to counsel and monitor patients on lifestyle modification is additional work which*  
288 *needs more resources like a bicycle and lunch allowance”*.

289

290

### 291 ***Perceived feasibility***

292 Regarding feasibility of implementing the intervention, there were mixed perceptions, with community  
293 nurses and CHWs believing that it was feasible to implement the intervention whilst some of the patients  
294 were a bit sceptical. Patients believed whilst the CHWs were trained to implement this intervention, their  
295 training is limited and that can affect the quality of advice that they give to patients. The patients went  
296 on to highlight that the nurses need to monitor and support these CHW. One of the female patients said  
297 this regarding that *“the CHWs have limited knowledge, there are other questions that they will not be*

298 *able to answer, therefore they may give us false information, especial on the issue of the foods that we*  
 299 *need to eat to manage our conditions.”*

300 Community health nurses did not highlight any potential challenges with this intervention. One of the  
 301 nurses said, *“I don’t see any challenges with this intervention. CHWs are competent and with our support,*  
 302 *this intervention will be very successful”*. This was also supported by other patients. One of the patients  
 303 said that *“this is a good intervention, please spread it to all the areas so that diabetes and hypertension*  
 304 *patients may live longer.”* A CHW said *this programme is feasible, what we just need is additional*  
 305 *support”*.

306

307 ***Table 3: Emerging Themes, Sub-Themes and Supporting Verbatim***

| <b><i>Main Theme</i></b> | <b><i>Subthemes</i></b>                                                                                                           | <b><i>Supporting verbatim</i></b>                                                                                                                                                                                                                                                                                                                                                                                                              |
|--------------------------|-----------------------------------------------------------------------------------------------------------------------------------|------------------------------------------------------------------------------------------------------------------------------------------------------------------------------------------------------------------------------------------------------------------------------------------------------------------------------------------------------------------------------------------------------------------------------------------------|
| Perceived effectiveness  | <ul style="list-style-type: none"> <li>i. Health outcomes</li> <li>ii. Health knowledge</li> <li>iii. Behaviour change</li> </ul> | <ul style="list-style-type: none"> <li>- Lifestyle modification is an important component of managing hypertension and diabetes, but some of our patients do not know that. Therefore, this intervention will help people to understand. Community Nurse, IDI</li> <li>- Teaching people is indeed helpful. We have done that in other programmes such as the Friendship bench. Those programmes were quite useful. Therefore, this</li> </ul> |



---

|                    |                                                   |                                                                                                                                                                                                |
|--------------------|---------------------------------------------------|------------------------------------------------------------------------------------------------------------------------------------------------------------------------------------------------|
|                    |                                                   | intervention will be also effective.                                                                                                                                                           |
|                    |                                                   | CHW, FGD                                                                                                                                                                                       |
|                    |                                                   | - Interventions that focus on teaching people do not work. Only medication helps sick people. Male Patient IDI                                                                                 |
| Perceived benefits | i. Empowerment                                    | -This intervention is very good. It will make us save money. We will no longer need to go to the clinics to ask about how to manage our conditions. Female Patient, IDI                        |
|                    | ii. Social support                                |                                                                                                                                                                                                |
|                    | iii. Access to health care and health information | -What's good about your intervention is that the CHWs live with us, so we can get information from them anytime, even on Sundays when you don't open your clinics. Male Patient IDI            |
|                    |                                                   | -Our patients are usually old and they do not have money to go to the clinics. So, teaching them at their home is a big benefit. CHW, FGD                                                      |
|                    |                                                   | -For diabetes and hypertensive patients, going to the clinic to get information only is a mammoth task because they need to pay consultation fee (USD5), Therefore this intervention will also |

---

---

benefit those without money. CHW,

FGD

-This intervention is good because when the CHW came to my home to teach me, my wife, and my grandchildren whom I stay with were also involved. This helps a lot because they now remind me to take the recommended actions Male Patient, IDI

- This is indeed good. With the prevalence of diabetes and hypertension increasing, they are better managed at community level, whilst we deal with cholera and other infectious diseases that are also highly prevalent in the City of Harare. Community Nurse

Perceived barriers

- i. Resource constraints
- ii. Resistance to change
- iii. Acceptance

-The challenge is that people will attend the counselling session, but they do not practice what we teach them. Therefore, the intervention will appear as if it is not effective CHW, FGD

-While we live in the community, carrying out home visits to counsel and

---

|                       |                               |                                                                                                                                                                                                    |
|-----------------------|-------------------------------|----------------------------------------------------------------------------------------------------------------------------------------------------------------------------------------------------|
|                       |                               | monitor patients on lifestyle modification is additional work which needs more resources like a bicycle and lunch allowance. CHW , FGD                                                             |
|                       |                               | -There are some patients who do not want the idea of home visits, they prefer to come to our homes . CHW, FGD .                                                                                    |
| Perceived feasibility | i. Ease of implementation     | -I don't see any challenges with this intervention. CHWs are competent and with our support, this intervention will be very successful.                                                            |
|                       | ii. Sustainability            | Community Nurse IDI                                                                                                                                                                                |
|                       | iii. Technical feasibility    | -This is a good intervention, please spread it to all the areas so that diabetes and hypertension patients may live longer                                                                         |
|                       | iv. Logistical considerations | Male Patient IDI                                                                                                                                                                                   |
|                       |                               | - This programme is feasible, what we just need is additional support CHW FGD                                                                                                                      |
|                       |                               | -The CHWs have limited knowledge, there are other questions that they will not be able to answer, therefore they may give us false information, especial on the issue of the foods that we need to |

---

---

eat to manage our conditions. Male patient, IDI

Perceived compatibility and ethicality

- i. Cultural compatibility
- ii. Religious compatibility
- iii. Confidentiality and privacy

- You did well by making our CHWs teach us about the food that we should eat when we are diagnosed with diabetes or hypertension. They give us examples of the food that is available in our communities, unlike your doctors who will say eat food that is not available in our society. Female patient IDI
  - When I teach the patient, I would have known already if his/ her religion does not allow some foods, so I will not mention those as examples of foods that should be eaten even if they are the recommended ones. I will talk about other acceptable substitutes. CHW, FGD
-

- 
- These ladies (CHWs) will come up with better educational messages than us because they know what the community wants, values and needs. Community Nurse, IDI
  - As for me, I am not comfortable with the CHWs coming to my home, they will notice my poverty. I would rather go to their home to receive counselling because they are public figures, so their homes are open to everyone. Male Patient, IDI

---

308

309

310 **DISCUSSION**

311 As the burden of NCDs continue to rise worldwide, LMICs continue to struggle to manage these  
312 conditions due to several challenges, that include staff shortages[26]. One emerging global strategy to  
313 address staff shortages in management of chronic conditions is using CHWs to reach vulnerable  
314 populations in under-resourced settings[27]. Several reviews have found that over 60% of CHWs in LMIC  
315 performed some sort of home-based care; however, most of these efforts focused on HIV/AIDS,

316 immunization and cancer and their work has also been mainly in rural areas[28,29]. Expanding on this  
317 work, we conducted a cluster randomized to assess the effects of community health worker -led health  
318 literacy intervention for lifestyle modification among hypertensive and diabetes patients that we  
319 designed[24] . To enhance our assessment of the intervention, we embedded a qualitative acceptability  
320 study on this cluster randomized trial. Our study aimed to explore the acceptability of a community  
321 health worker-led health literacy intervention on lifestyle modification among hypertension and diabetes  
322 patients in the City of Harare.

323

324 Findings from our study indicated that, the intervention is generally acceptable by the patients, the CHWs  
325 and community nurses, based on five dimensions, which are perceived benefits, perceived barriers,  
326 perceived compatibility, perceived feasibility and perceived effectiveness. Interventions involving  
327 community health workers have been proven to be acceptable in other settings world-wide [22,30]. This  
328 could be because CHWs are respectable community members, hence their advice can be easily accepted  
329 within communities. The fact that they undergo some training also enhances their acceptability in the  
330 communities that they serve. Training was highlighted as the key facilitators of acceptability of CHWs in  
331 a rural area in South Africa [2].

332

333 Whilst our intervention was perceived to have many benefits by all the categories of participants  
334 (patients, CHWs and nurses), it is also important to take note of the potential challenges that were  
335 mentioned by the patients and the CHWs. Patients were concerned that the CHWs may not be competent  
336 to respond to some of their questions. This is an important finding which should not be ignored when  
337 scaling up the intervention. One strategy of addressing this concern is through thorough training of CHWs  
338 before implementing the intervention and close support and supervision by nurses during

339 implementation. As highlighted by Stansert et al, CHWs are accepted when the community know that  
340 they are trained and when they receive occasional support from professional healthcare workers [2] The  
341 CHWs themselves also highlighted the need for extra support in terms of transport and financial  
342 allowances. This should also be considered when scaling up the intervention. Inadequate resources has  
343 been highlighted as one of the key challenges that hinder effective implementation of CHW interventions  
344 in LMICs[5,30,31], hence in needs to be addressed to ensure programme success.

345

346 Our study has several notable strengths. We conducted the study during the implementation of the  
347 intervention. Therefore, recall bias was minimized since the participants were still recalling their  
348 experience with the implementation of the intervention. We also assessed the acceptability from the  
349 perspectives of all those categories of people who are key to the success of the intervention (the  
350 beneficiaries- patients, the implementers- CHWs and the supervisors- community nurses). Therefore, our  
351 findings are quite rich. Nevertheless, there are some limitations to our study. We cannot rule out the  
352 possibility of social desirability bias, particularly from the patients and the CHWs. There is a possibility  
353 that they could not have highlighted the potential challenges of the intervention because the principal  
354 investigator was involved in the conduct of the in-depth interviews and the focus group discussions. We  
355 tried to minimize this by limiting the role of the principal investigator to recording responses only. Two  
356 research assistants who were not part of the intervention are the ones who interviewed participants and  
357 facilitated focus group discussions. Secondly, results on the perceived effectiveness could be limited  
358 because the data was collected during the implementation of the intervention, such that the ultimate  
359 benefit may not have been experience. To this end, we recommend a post acceptability assessment.  
360 Nonetheless, the results for this study provide valuable information for upscaling of the intervention.

361

362 **CONCLUSION**

363 Although there is vast evidence regarding effectiveness of community-based interventions for NCDs,  
364 effectiveness alone does not guarantee the success of public health interventions. Acceptability is also  
365 important, because many effective interventions may not yield the expected results due to low uptake  
366 resulting from unacceptable interventions. Our community health worker-led health literacy  
367 intervention for lifestyle modification intervention was perceived as having many benefits and thus  
368 acceptable by hypertension and diabetes patients, community health workers and community nurses in  
369 the city of Harare.



370 **ACKNOWLEDGEMENTS**

371 We would like to acknowledge the City of Harare, City Health Director for granting permission  
372 to carry out the study in the city of Harare health facilities. We also extend our gratitude to  
373 the study participants ( diabetes and hypertension patients, CHWs and community nurses ).  
374 We would also like to thank our colleagues from the department of global public health and  
375 family medicine for per review of our study proposal

376

377 Research reported in this publication was financially supported by the Fogarty International  
378 Center and National Institute of Dental and Craniofacial Research of the National Institutes of  
379 Health under Award Number D43 TW011968. The content is solely the responsibility of the  
380 authors and does not necessarily represent the official views of the National Institutes of  
381 Health

382

383 **CONFLICT OF INTEREST**

384 The authors declare no conflict of interest.

385

386 **DATA AVAILABILITY**

387 The consent and ethical approvals for this study does not have any restrictions for data  
388 sharing. Therefore, the data sets generated from this study will be made available to the  
389 public upon request.

390

391 **AUTHORS' CONTRIBUTIONS**

392 NAK: conceptualisation of study, data collection, data analysis and drafting of first draft and  
393 subsequent drafts leading to the final manuscript; ED and AD; data collection, data analysis  
394 and reviewing of initial manuscript and subsequent drafts . SR, SS and GTF: Reviewing of study  
395 proposal, reviewing of initial manuscript and subsequent drafts. All authors read and  
396 approved the final manuscript.

397

## 398 REFERENCES

399

- 400 [1] Zuñiga RO, Parra-García I, Gómez-Barrera LA. Overview of the participation of  
401 community health workers in primary health care in 6 Latin American countries and a  
402 proposal for their integration into the health system: a qualitative study. *Fam Pract* 2024.  
403 <https://doi.org/10.1093/fampra/cmae002>.
- 404 [2] Stansert Katzen L, Skeen S, Dippenaar E, Laurenzi C, Notholi V, le Roux K, et al.  
405 Community Health Workers' experiences of an intervention to provide them with  
406 increased support and supervision: a qualitative study of a home visiting model in rural  
407 South Africa. *Discover Health Systems* 2024;3:4. [https://doi.org/10.1007/s44250-023-](https://doi.org/10.1007/s44250-023-00064-4)  
408 [00064-4](https://doi.org/10.1007/s44250-023-00064-4).
- 409 [3] Peek ME, Ferguson M, Bergeron N, Maltby D, Chin MH. Integrated Community-Healthcare  
410 Diabetes Interventions to Reduce Disparities 2014. [https://doi.org/10.1007/s11892-](https://doi.org/10.1007/s11892-013-0467-8)  
411 [013-0467-8](https://doi.org/10.1007/s11892-013-0467-8).
- 412 [4] Tuyisenge G, Crooks VA, Berry NS. Facilitating equitable community-level access to  
413 maternal health services : exploring the experiences of Rwanda ' s community health  
414 workers 2019;4:1–10.
- 415 [5] Olaniran A, Smith H, Unkels R, Bar-Zeev S, van den Broek N. Who is a community health  
416 worker? - a systematic review of definitions. *Glob Health Action* 2017;10:1272223.  
417 <https://doi.org/10.1080/16549716.2017.1272223>.

- 418 [6] World Health Organization. World health statistics 2019: Monitoring health for the SDGs.  
419 Geneva: World Health Organization. 2019.
- 420 [7] WHO. Noncommunicable Diseases Country Profiles 2018. 2018.  
421 <https://doi.org/10.1186/1688-7786-9-007>.
- 422 [8] CHSD. Closing the gap in a generation Health equity through action on the social  
423 determinants of health Commission on Social Determinants of Health FINAL REPORT  
424 Closing the gap in a generation Contents. 2008.
- 425 [9] Community Health Workers in Diabetes Prevention and Management in Developing  
426 Countries. *Ann Glob Health* 2017;83:661–75.  
427 <https://doi.org/10.1016/j.AOGH.2017.10.009>.
- 428 [10] Brownstein JN, Chowdhury FM, Norris SL, Horsley T, Jack L, Zhang X, et al. Effectiveness  
429 of Community Health Workers in the Care of People with Hypertension. *Am J Prev Med*  
430 2007;32:435–47. <https://doi.org/10.1016/j.amepre.2007.01.011>.
- 431 [11] World Health Organization (WHO). Hypertension and Diabetes Fact Sheets.  
432 WHO, Geneva, Switzerland 2018. [https://www.who.int/news-room/fact-](https://www.who.int/news-room/fact-sheets/detail/hypertension)  
433 [sheets/detail/hypertension](https://www.who.int/news-room/fact-sheets/detail/hypertension) (accessed September 16, 2019).
- 434 [12] Mishra SR, Neupane D, Preen D, Kallestrup P, Perry HB. Mitigation of non-communicable  
435 diseases in developing countries with community health workers. *Global Health*  
436 2015;11:43. <https://doi.org/10.1186/s12992-015-0129-5>.
- 437 [13] Scott K, Beckham SW, Gross M, Pariyo G, Rao KD, Cometto G, et al. What do we know  
438 about community-based health worker programs? A systematic review of existing  
439 reviews on community health workers. *Hum Resour Health* 2018;16.  
440 <https://doi.org/10.1186/s12960-018-0304-x>.
- 441 [14] Yokokawa H, Fukuda H, Yuasa M, Sanada H, Hisaoka T, Naito T. Association between  
442 health literacy and metabolic syndrome or healthy lifestyle characteristics among  
443 community-dwelling Japanese people. *Diabetol Metab Syndr* 2016;8.  
444 <https://doi.org/10.1186/s13098-016-0142-8>.

- 445 [15] Ibrahim N, Ming Moy F, Awalludin IAN, Mohd Ali Z, Ismail IS. Effects of a Community-  
446 Based Healthy Lifestyle Intervention Program (Co-HELP) among Adults with Prediabetes  
447 in a Developing Country: A Quasi-Experimental Study. PLoS One 2016;11:e0167123.  
448 <https://doi.org/10.1371/journal.pone.0167123>.
- 449 [16] Scott K, Beckham SW, Gross M, Pariyo G, Rao KD, Cometto G, et al. What do we know  
450 about community-based health worker programs? A systematic review of existing  
451 reviews on community health workers. Hum Resour Health 2018;16:1–17.  
452 <https://doi.org/10.1186/s12960-018-0304-x>.
- 453 [17] Islam NS, Zanolwiak JM, Wyatt LC, Kavathe R, Singh H, Kwon SC, et al. Diabetes prevention  
454 in the new york city sikh asian Indian community: A pilot study. Int J Environ Res Public  
455 Health 2014;11:5462–86. <https://doi.org/10.3390/ijerph110505462>.
- 456 [18] Chimberengwa PT, Naidoo M. A description of community-based participatory research  
457 of hypertension awareness, prevention and treatment in a district of Matabeleland South  
458 Province, Zimbabwe. Afr J Prim Health Care Fam Med 2019;11:1–9.  
459 <https://doi.org/10.4102/phcfm.v11i1.1839>.
- 460 [19] Jeet G, Thakur JS, Prinja S, Singh M. Community health workers for non-communicable  
461 diseases prevention and control in developing countries: Evidence and implications.  
462 PLoS One 2017;12:e0180640. <https://doi.org/10.1371/journal.pone.0180640>.
- 463 [20] Egbujie BA. Role of community health workers in type 2 diabetes mellitus self-  
464 managemen...: Discovery Service for UNIVERSITY OF ZIMBABWE n.d.
- 465 [21] Gyawali B, Bloch J, Vaidya A, Kallestrup P. Community-based interventions for prevention  
466 of Type 2 diabetes in low- And middle-income countries: A systematic review. Health  
467 Promot Int 2019;34:1218–30. <https://doi.org/10.1093/heapro/day081>.
- 468 [22] Sekhon M, Cartwright M, Francis JJ. Acceptability of healthcare interventions: An  
469 overview of reviews and development of a theoretical framework. BMC Health Serv Res  
470 2017;17. <https://doi.org/10.1186/s12913-017-2031-8>.
- 471 [23] Gore O, Mukanangana F, Muza C, Chiweshe MK. The role of Village Health Workers and

- 472 challenges faced in providing primary health care in Mutoko and Mudzi Districts in  
473 Zimbabwe 2015;4:129–35.
- 474 [24] Katena NA, Shamu S, Tafadzwa Fana G, Rusakaniko S. Effects of a Community Health  
475 Worker–Led Health Literacy Intervention on Lifestyle Modification Among Patients With  
476 Hypertension and Diabetes in the City of Harare, Zimbabwe: Protocol for a Cluster  
477 Randomized Controlled Trial. *JMIR Res Protoc* 2023;12. <https://doi.org/10.2196/47512>.
- 478 [25] Braun and Clarke. Thematic analysis . n.d.
- 479 [26] Sachs JD. Achieving universal health coverage in low-income settings. *The Lancet*  
480 2012;380:944–7. [https://doi.org/10.1016/S0140-6736\(12\)61149-0](https://doi.org/10.1016/S0140-6736(12)61149-0).
- 481 [27] Peek ME, Ferguson M, Bergeron N, Maltby D, Chin MH. Integrated community-healthcare  
482 diabetes interventions to reduce disparities. *Curr Diab Rep* 2014;14.  
483 <https://doi.org/10.1007/s11892-013-0467-8>.
- 484 [28] Cyril S, Smith BJ, Possamai-Inesedy A, Renzaho AMN. Exploring the role of community  
485 engagement in improving the health of disadvantaged populations: a systematic review.  
486 *Glob Health Action* 2015;8:29842. <https://doi.org/10.3402/GHA.V8.29842>.
- 487 [29] Huang W, Long H, Li J, Tao S, Zheng P, Tang S, et al. Delivery of public health services by  
488 community health workers (CHWs) in primary health care settings in China: a systematic  
489 review (1996–2016). *Glob Health Res Policy* 2018;3:1–29.  
490 <https://doi.org/10.1186/s41256-018-0072-0>.
- 491 [30] Olaniran A, Banke-Thomas A, Bar-Zeev S, Madaj B. Not knowing enough, not having  
492 enough, not feeling wanted: Challenges of community health workers providing maternal  
493 and newborn services in Africa and Asia. *PLoS One* 2022;17.  
494 <https://doi.org/10.1371/journal.pone.0274110>.
- 495 [31] Owusu MF, Adu J, Gyamfi S, Martin-Yeboah E, Dorte BA. Tackling the non-communicable  
496 disease epidemic: a framework for policy action in low- and middle-income countries.  
497 *Pan African Medical Journal* 2024;47. <https://doi.org/10.11604/pamj.2024.47.82.41089>.

498
